# Supplementary material for: Direct CO2capture from simulated and ambient air over silica-rich MIL-101(Cr)
Source: Royal Society of Chemistry journal article supplement (doi:10.1039/d3re00329a), 2023-01-01
Supplement: d3re00329a1.pdf [file d3re00329a1.pdf]

## ESI

# Direct CO<sub>2</sub> capture from simulated and ambient air over silica-rich MIL-101(Cr)

Vaishnavi Kulkarni,<sup>†</sup> and Sanjay Kumar Singh<sup>\*,†</sup>

<sup>†</sup>Department of Chemistry, Indian Institute of Technology Indore, Simrol, Indore 453552, India

e-mail: sksingh@iiti.ac.in (SKS)

## Table of Contents

| Contents                                                                                                                                                                      | Page No. |
|-------------------------------------------------------------------------------------------------------------------------------------------------------------------------------|----------|
| Experimental Section                                                                                                                                                          | S3       |
| Characterization                                                                                                                                                              | S3       |
| Evaluation of CO <sub>2</sub> adsorption performance                                                                                                                          | S4       |
| <b>Scheme S1.</b> Schematic representation for the synthesis of RHA-MIL-101(Cr).                                                                                              | S5       |
| <b>Scheme S2.</b> Schematic representation for the synthesis of pelletized and granular form of RHA-MIL-101(Cr)-IV.                                                           | S6       |
| <b>Figure S1.</b> Raman spectra of MIL-101(Cr) and RHA-MIL-101(Cr).                                                                                                           | S6       |
| <b>Figure S2.</b> (a) TGA and (b) DTA curves of RHA, MIL-101(Cr) and RHA-MIL-101(Cr).                                                                                         | S7       |
| <b>Figure S3.</b> SEM images of (a) MIL-101(Cr), (b) RHA-MIL-101(Cr)-I, (c) RHA-MIL-101(Cr)-II (d) RHA-MIL-101(Cr)-III, (e) RHA-MIL-101(Cr)-IV, and (f) RHA-MIL-101(Cr)-V.    | S8       |
| <b>Figure S4.</b> EDS of (a) RHA, (b) MIL-101(Cr), (c) RHA-MIL-101(Cr)-I, (d) RHA-MIL-101(Cr)-II, (e) RHA-MIL-101(Cr)-III, (f) RHA-MIL-101(Cr)-IV, and (g) RHA-MIL-101(Cr)-V. | S9       |
| <b>Figure S5.</b> CO <sub>2</sub> adsorption of RHA at 30 °C for 12 h at 30 °C under 400 ppm of CO <sub>2</sub> in He.                                                        | S10      |

|                                                                                                                                                                                                                                                                                                                                                                                                                                          |                |
|------------------------------------------------------------------------------------------------------------------------------------------------------------------------------------------------------------------------------------------------------------------------------------------------------------------------------------------------------------------------------------------------------------------------------------------|----------------|
| <b>Figure S6.</b> (a) CO <sub>2</sub> uptake profiles and (b) the normalized dynamic CO <sub>2</sub> uptake profiles of MIL-101(Cr) and RHA-MIL-101(Cr) at 30 °C for 12 h under 400 ppm of CO <sub>2</sub> in He.                                                                                                                                                                                                                        | <b>S10</b>     |
| <b>Figure S7.</b> (a) N <sub>2</sub> adsorption–desorption isotherms at –196 °C, and (b) pore size distribution of RHA, MIL-101(Cr), and RHA-MIL-101(Cr) obtained from N <sub>2</sub> adsorption isotherm. (c,d) Micropore size distribution of MIL-101(Cr) and RHA-MIL-101(Cr) obtained from CO <sub>2</sub> adsorption isotherm at 0 °C.                                                                                               | <b>S11</b>     |
| <b>Figure S8.</b> Pore size distribution of (a) MIL-101(Cr), and (b-f) RHA-MIL-101(Cr) calculated from CO <sub>2</sub> adsorption isotherm at 0 °C.                                                                                                                                                                                                                                                                                      | <b>S12</b>     |
| <b>Figure S9.</b> (a) P-XRD pattern, (b) FTIR spectra (c) N <sub>2</sub> adsorption–desorption isotherms at –196 °C, (d) pore size distribution obtained from N <sub>2</sub> adsorption isotherm, and (e,f) micropore size distribution obtained from CO <sub>2</sub> adsorption isotherm at 0 °C, (g) comparative table of textural properties of RHA-MIL-101(Cr)-IV-Powder, RHA-MIL-101(Cr)-IV-Granule, and RHA-MIL-101(Cr)-IV-Pellet. | <b>S13</b>     |
| <b>Figure S10.</b> (a) CO <sub>2</sub> uptake under 400 ppm CO <sub>2</sub> at 30°C, and (b) P-XRD patterns of pristine, humid, and aged RHA-MIL-101(Cr)-IV.                                                                                                                                                                                                                                                                             | <b>S14</b>     |
| <b>Figure S11.</b> DSC profiles corresponding to desorption of CO <sub>2</sub> from RHA-MIL-101(Cr)-IV.                                                                                                                                                                                                                                                                                                                                  | <b>S14</b>     |
| <b>Figure S12.</b> Temperature-swing adsorption (TSA) cycles of MIL-101(Cr) (Adsorption condition: 30 °C for 30 min. Desorption condition: 110 °C for 30 min).                                                                                                                                                                                                                                                                           | <b>S14</b>     |
| <b>Table S1.</b> Si and Cr content obtained from ICP-AES analysis for RHA-MIL-101(Cr).                                                                                                                                                                                                                                                                                                                                                   | <b>S15</b>     |
| <b>Table S2.</b> Comparative chart of CO <sub>2</sub> adsorption performance of adsorbents under DAC condition.                                                                                                                                                                                                                                                                                                                          | <b>S15-S16</b> |
| <b>Table S3.</b> Comparative chart of amine-based sorbent regeneration and cyclic CO <sub>2</sub> adsorption-desorption stability for DAC applications.                                                                                                                                                                                                                                                                                  | <b>S16-S17</b> |
| <b>References</b>                                                                                                                                                                                                                                                                                                                                                                                                                        | <b>S17-S19</b> |

## 1. Experimental Section

### 1.1 Materials

Terephthalic acid (H<sub>2</sub>BDC, 98%), chromium (III) nitrate nonahydrate (Cr(NO<sub>3</sub>)<sub>3</sub>·9H<sub>2</sub>O, 98%), nitric acid (68–70%), acetone (≥ 99%), hydrochloric acid (36.5–38%), and distilled water were provided by Merck. Anhydrous ethanol, used as a solvent, was purchased from Changshu Hongsheng Fine Chemical Company. All these materials and reagents were utilized without any further purification. Rice husk ash (RHA) was supplied by Nishant Enterprises India and pre-treated before use. The high purity N<sub>2</sub> (99.99%) and 400 ppm CO<sub>2</sub> in He (99.99%) were supplied by Inox air products Pvt. Ltd. and Sigma gases and services, India, respectively for the adsorption measurement.

### 2. Characterization

The powder X-ray diffraction (P-XRD) patterns of the adsorbents are obtained with a Rigaku Smart Lab automated powder X-ray diffractometer with monochromatic Cu K $\alpha$  radiation ( $\lambda = 0.154$  nm) and a 0.01° step size over a  $2\theta$  range of 2° to 30°. Fourier transform infrared spectroscopy (FTIR) is used to evaluate the vibrational properties of various functional groups present in the adsorbents and is acquired in the wavenumber range of 4000–500 cm<sup>-1</sup> using a spectrometer with an attenuated total reflectance (FTIR/ATR 229 model FTIR-STD-10, PerkinElmer, MA, USA). Further, to investigate the thermal stability of the analysed adsorbents, a thermogravimetric study (TGA) is done from 25 °C to 800 °C at a heating rate of 5 °C min<sup>-1</sup> in N<sub>2</sub> environment using a Mettler-Toledo TGA/DSC-1 thermal analyzer. Carl Zeiss Supra-55 and an EDS Oxford instrument (X-Max, energy-dispersive X-ray spectrometer) are used to capture FESEM images and EDS spectra, respectively. Similarly, an FEI Talos 200S transmission electron microscope with a 200 kV Field Emission Gun is used to obtain EDS elemental mapping and transmission electron microscopic (TEM) images. Inductively coupled plasma atomic emission spectroscopy (ICP-AES) analysis is performed on ARCOS, simultaneous ICP spectrometer (make: SPECTRO, analytical instruments GmbH, Germany) (spectral wavelength range: 130 nm to 770 nm). The Raman spectra is acquired using a Labram HR evolution Raman spectrometer (Horiba Jobin Yvon) with an argon-ion laser ( $\lambda = 532$  nm). The textural parameters (specific surface area, pore volume, and pore size distribution) at -196°C are measured using a Quantachrome Autosorb iQ2 TPX automated gas sorption system. The Brunauer–Emmett–Teller (BET) equation was used to calculate the specific surface areas of the adsorption data for the relative pressure (P/P<sub>0</sub>) range of 0.05–0.20. The

total pore volume ( $V_{\text{total}}$ ) was calculated from the quantity of adsorbed  $N_2$  at  $P/P_0 = 0.99$  using the single point adsorption method. Micropore volume ( $V_{\text{micro}}$ ) was calculated using the t-plot method, whereas ultra-micropore volume ( $V_{\text{ultramicro}}$ ) was calculated using the NLDFT method for pores smaller than 0.7 nm.

### 3. Evaluation of $CO_2$ adsorption performance of powder and structured RHA-MIL-101(Cr)

The recovery of  $CO_2$  adsorption capacity of pelletized and granular form of RHA-MIL-101(Cr)-IV as compared to the powdered adsorbent is calculated using Eq. S1.<sup>1</sup>

$$\text{Recovery (\%)} = \frac{\text{CO}_2 \text{ adsorption capacity of pelletized/granulated adsorbent}}{\text{CO}_2 \text{ adsorption capacity of powdered adsorbent}} \times 100$$

(S1)

### 4. Evaluation of heat of desorption of $CO_2$

The heat of desorption of  $CO_2$ -saturated RHA-MIL-101(Cr) is measured using differential scanning calorimetry (DSC) according to the procedure outlined by Su et al.<sup>14</sup> and Gray et al.<sup>15</sup> In this method, a  $CO_2$ -saturated RHA-MIL-101(Cr) sample weighing between 0.03 to 0.09 g is placed in an aluminum pan. The pan is pierced with a pinhole, and then it is mounted in a DSC analyzer (Perkin Elmer 8000). The sample is initially held at 30 °C for 1 minute to stabilize the signal, followed by heating from 30 °C to 110 °C at a rate of 5 °C/min in the presence of a dry nitrogen atmosphere (20 mL/min). This heating process allows the  $CO_2$  retained in the sample to be desorbed. Prior to the experiment, a blank run and baseline correction are performed, and the heat of desorption is analyzed from the DSC profile by measuring the area corresponding to the endothermic peak using Pyris™ software built into the DSC machine. The temperature calibration of the DSC is carried out using the melting point of an indium sample (156.60 °C).

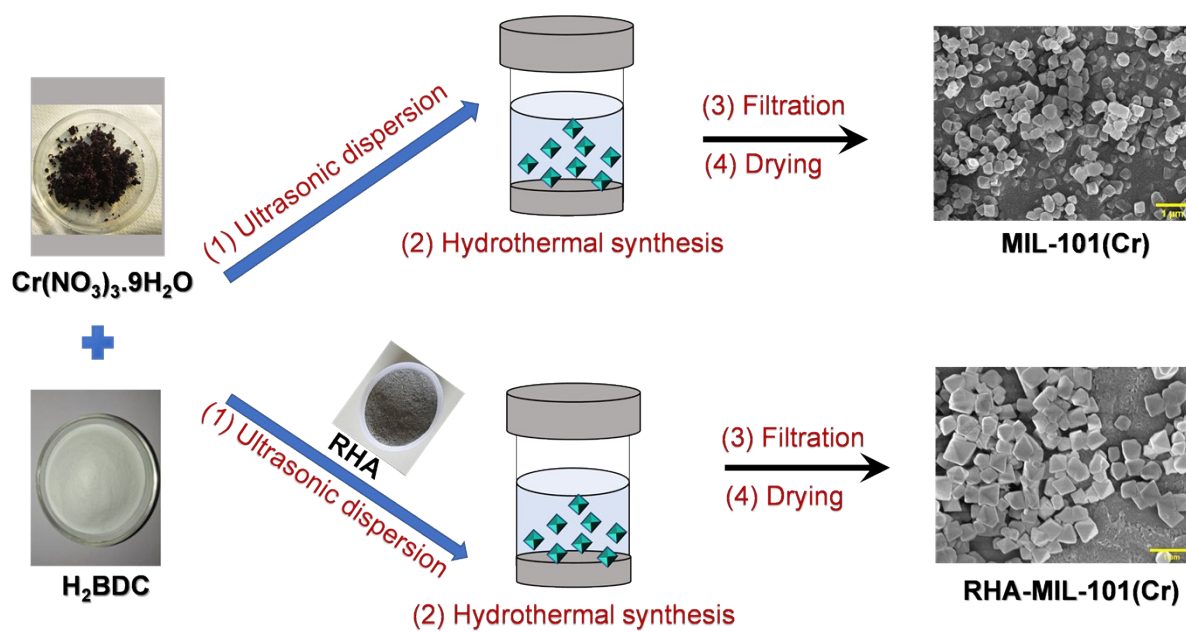

**Scheme S1.** Schematic representation for the synthesis of RHA-MIL-101(Cr).

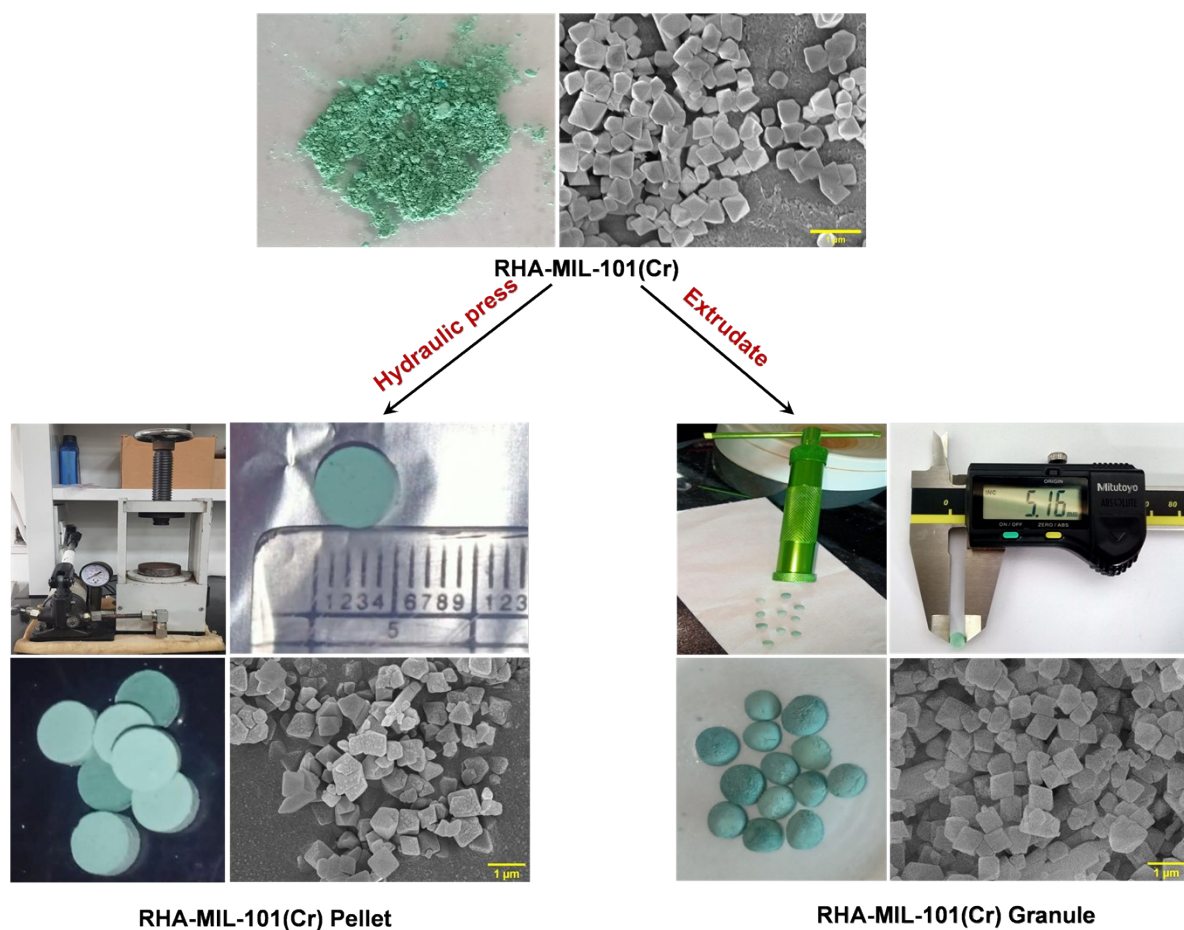

S

**cheme S2.** Schematic representation for the synthesis of RHA-MIL-101(Cr) pellet and RHA-MIL-101(Cr) granule.

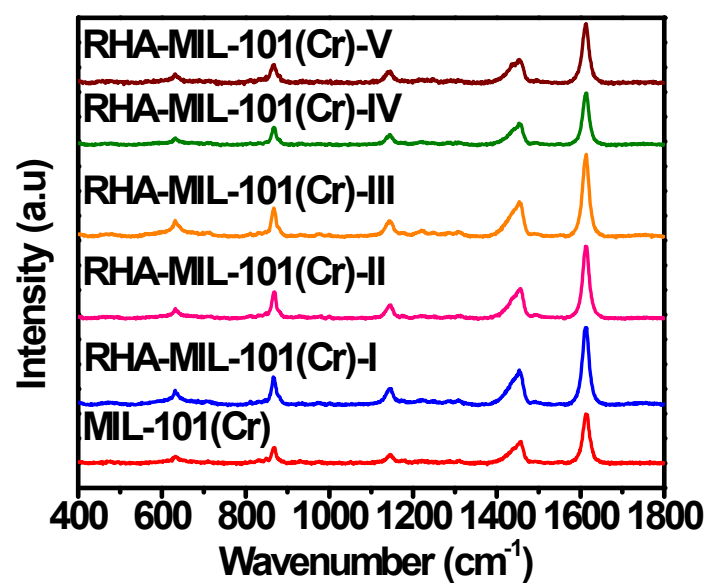

**Figure S1.** Raman spectra of MIL-101(Cr) and RHA-MIL-101(Cr).

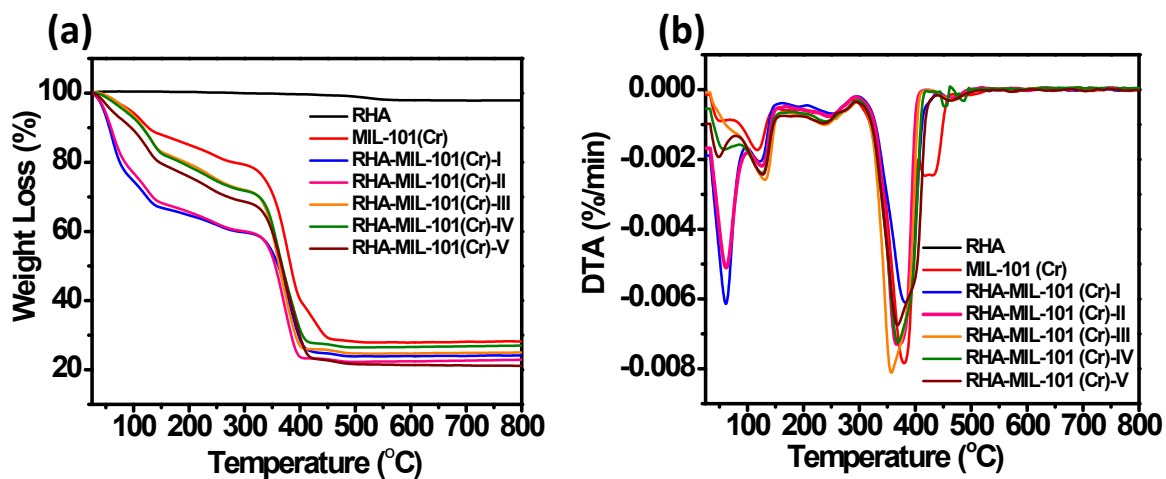

Figure S2. (a) TGA and (b) DTA curves of RHA, MIL-101(Cr) and RHA-MIL-101(Cr).

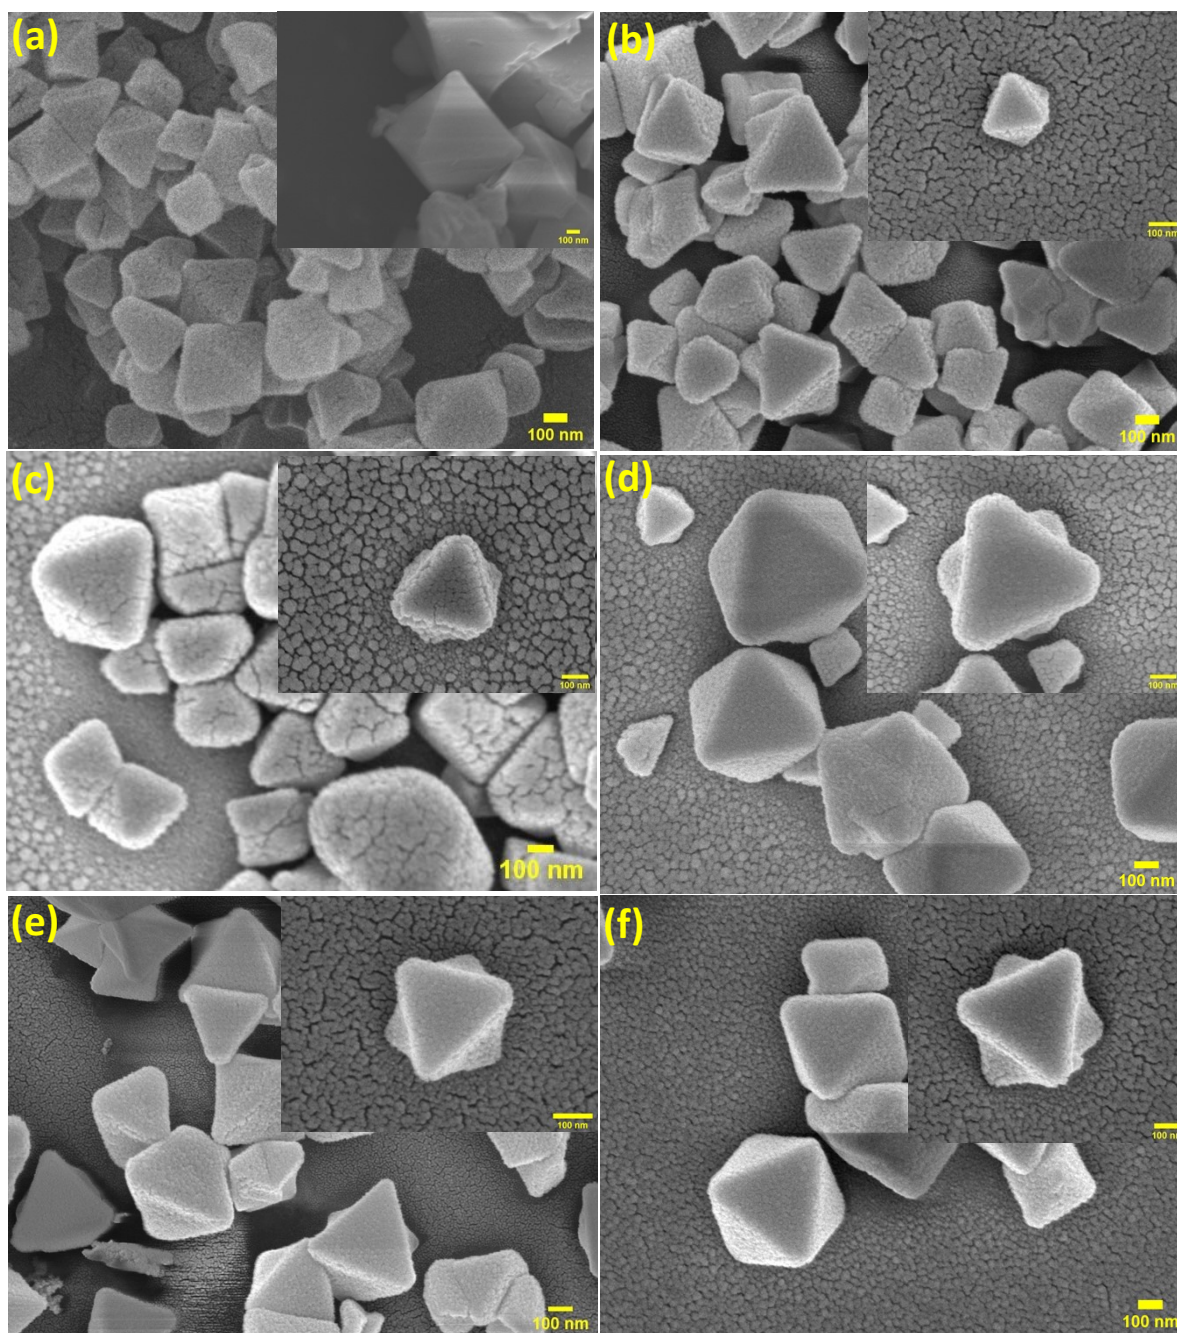

**Figure S3.** SEM images of (a) MIL-101(Cr), (b) RHA-MIL-101(Cr)-I, (c) RHA-MIL-101(Cr)-II (d) RHA-MIL-101(Cr)-III, (e) RHA-MIL-101(Cr)-IV, and (f) RHA-MIL-101(Cr)-V.



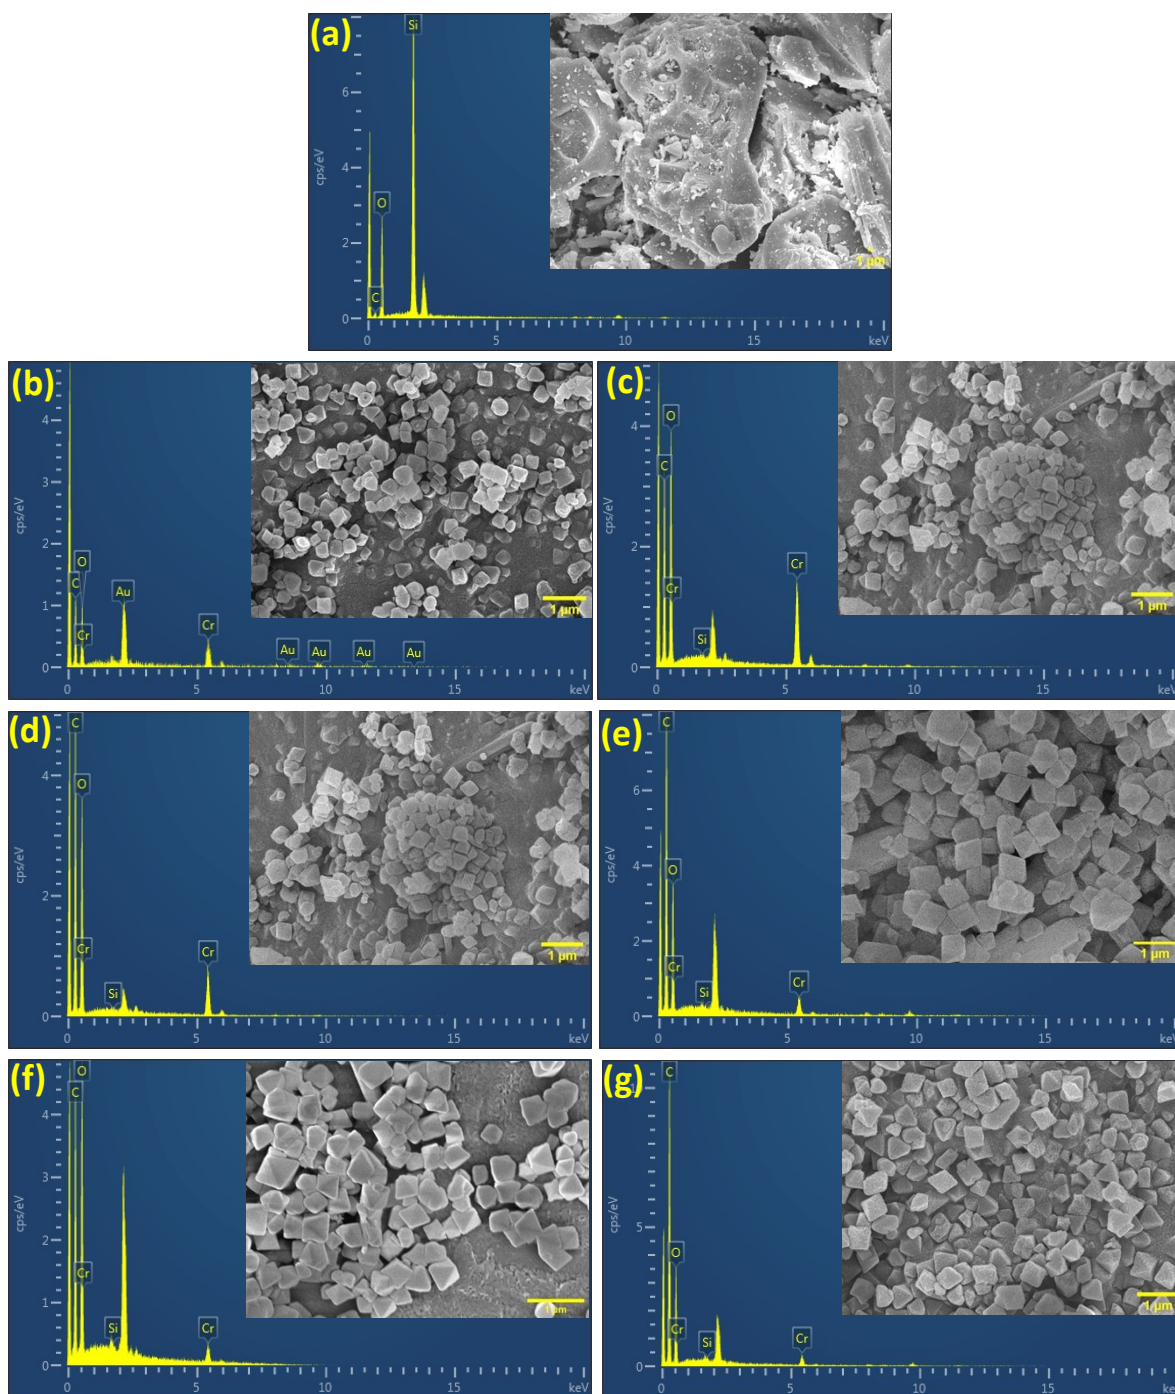

**Figure S4.** EDS of (a) RHA, (b) MIL-101(Cr), (c) RHA-MIL-101(Cr)-I, (d) RHA-MIL-101(Cr)-II, (e) RHA-MIL-101(Cr)-III, (f) RHA-MIL-101(Cr)-IV, and (g) RHA-MIL-101(Cr)-V.

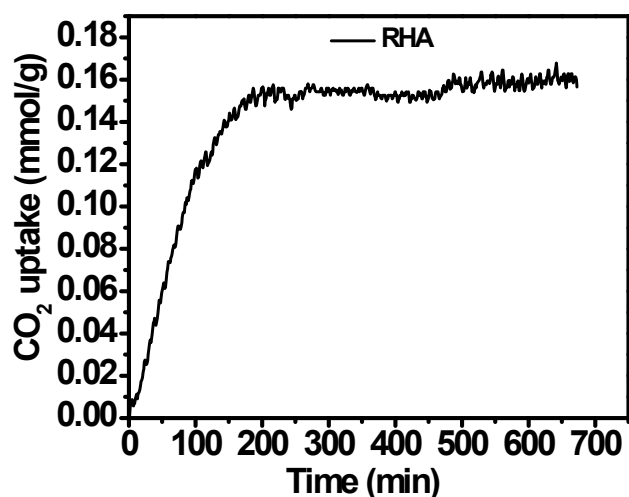

Figure S5. CO<sub>2</sub> adsorption of RHA for 12 h at 30 °C under 400 ppm of CO<sub>2</sub> in He.

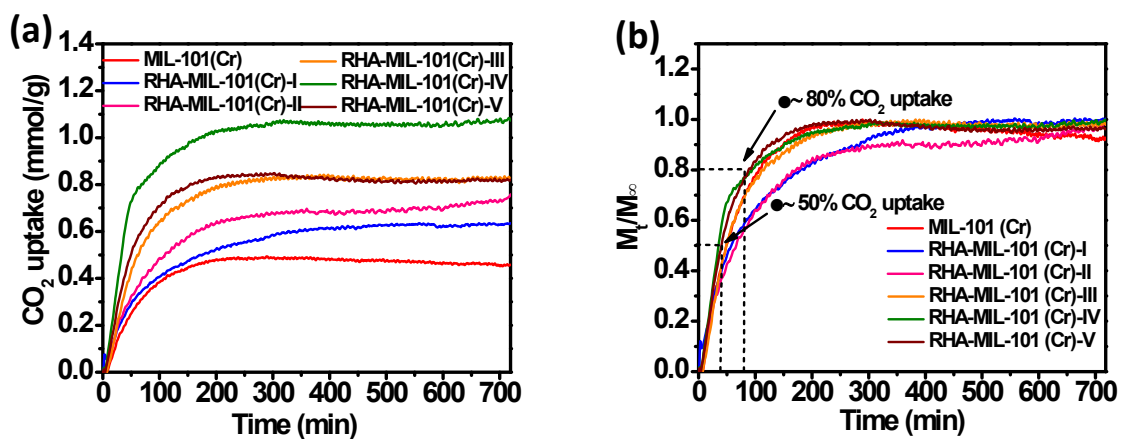

Figure S6. (a) CO<sub>2</sub> uptake profiles and (b) the normalized dynamic CO<sub>2</sub> uptake profiles of MIL-101(Cr) and RHA-MIL-101(Cr) at 30 °C for 12 h under 400 ppm of CO<sub>2</sub> in He.

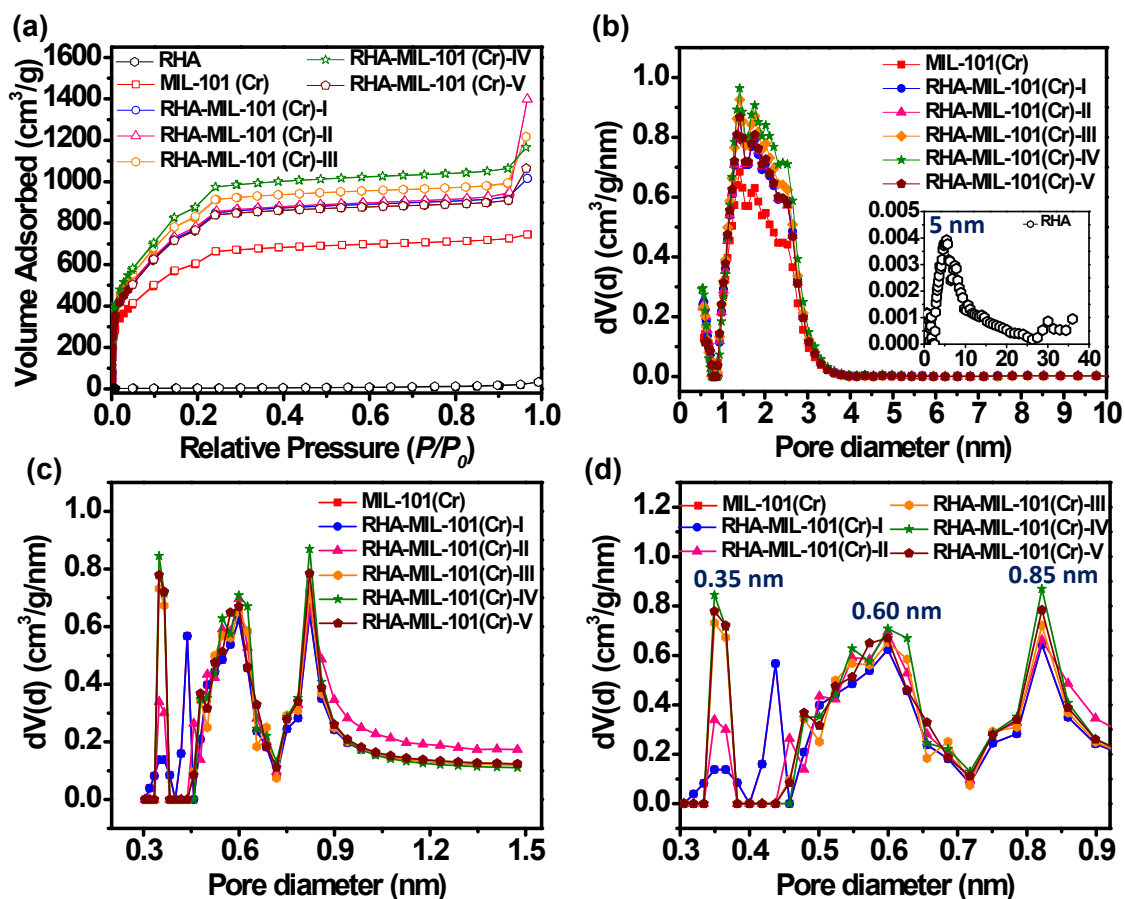

**Figure S7.** (a) N<sub>2</sub> adsorption–desorption isotherms at -196 °C, and (b) pore size distribution of RHA, MIL-101(Cr), and RHA-MIL-101(Cr) obtained from N<sub>2</sub> adsorption isotherm. (c,d) micropore size distribution of MIL-101(Cr) and RHA-MIL-101(Cr) obtained from CO<sub>2</sub> adsorption isotherm at 0 °C.

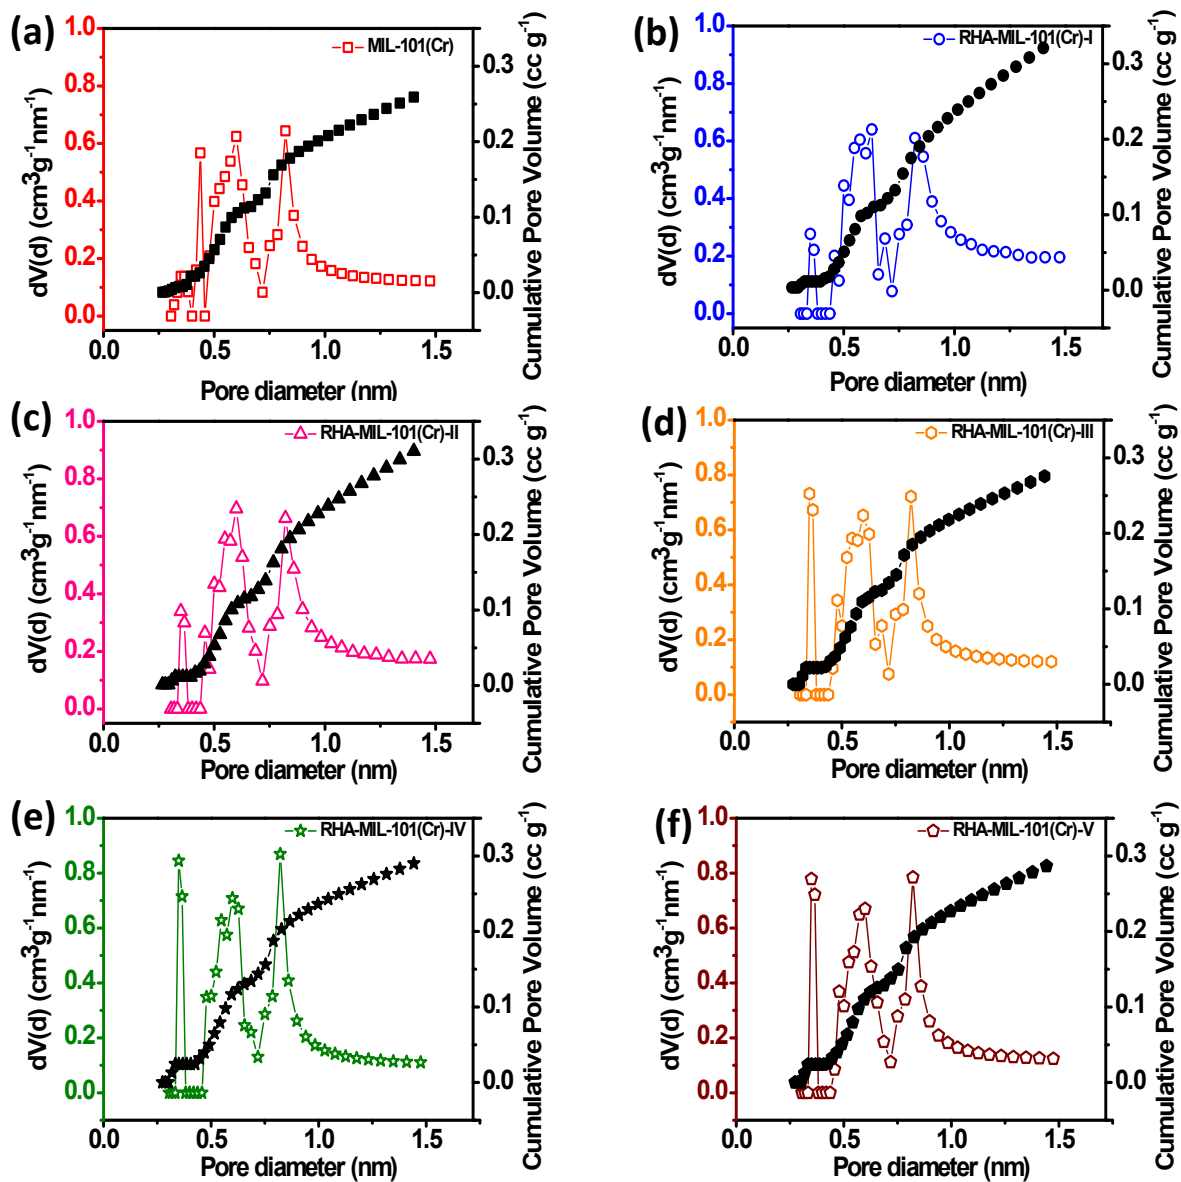

**Figure S8.** Pore size distribution of (a) MIL-101(Cr), and (b-f) RHA-MIL-101(Cr) calculated from CO<sub>2</sub> adsorption isotherm at 0 °C.

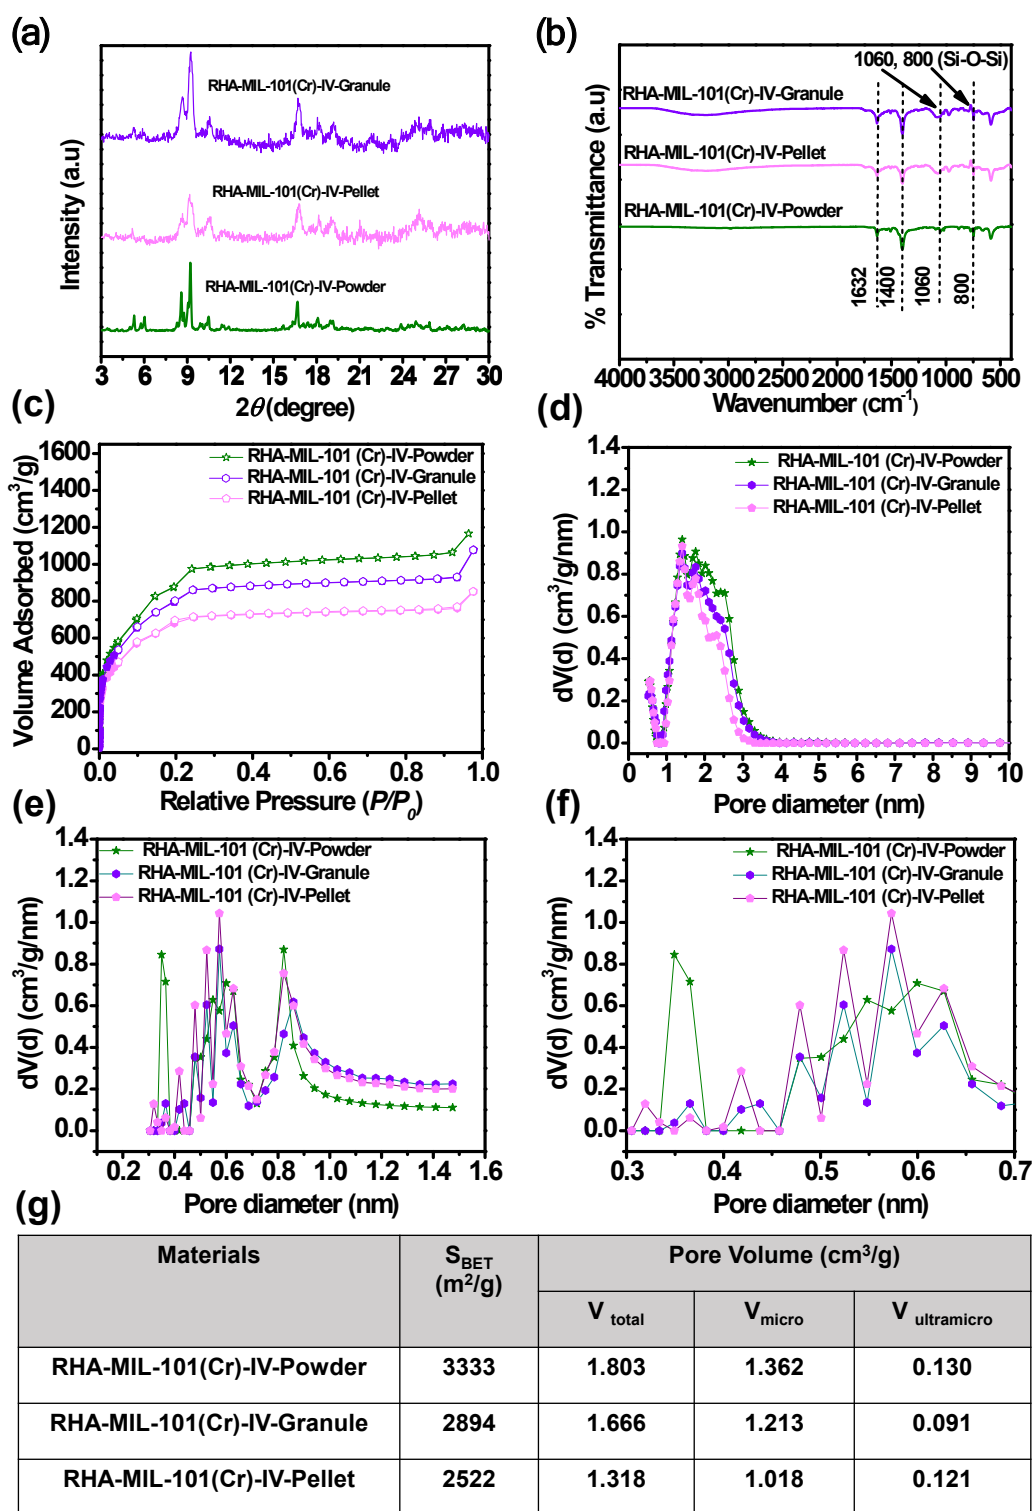

**Figure S9.** (a) P-XRD pattern, (b) FTIR spectra (c)  $\text{N}_2$  adsorption–desorption isotherms at  $-196^\circ\text{C}$ , (d) pore size distribution obtained from  $\text{N}_2$  adsorption isotherm, and (e,f) micropore size distribution obtained from  $\text{CO}_2$  adsorption isotherm at  $0^\circ\text{C}$ , (g) comparative table of textural properties of RHA-MIL-101(Cr)-IV-Powder, RHA-MIL-101(Cr)-IV-Granule, and RHA-MIL-101(Cr)-IV-Pellet.

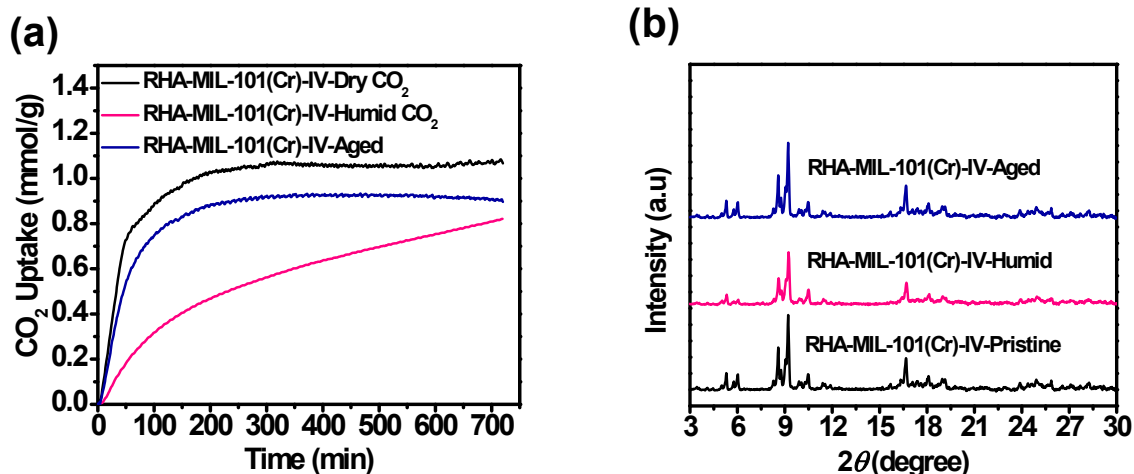

**Figure S10.** (a) CO<sub>2</sub> uptake under 400 ppm CO<sub>2</sub> at 30°C, and (b) P-XRD patterns of pristine, humid, and aged RHA-MIL-101(Cr)-IV.

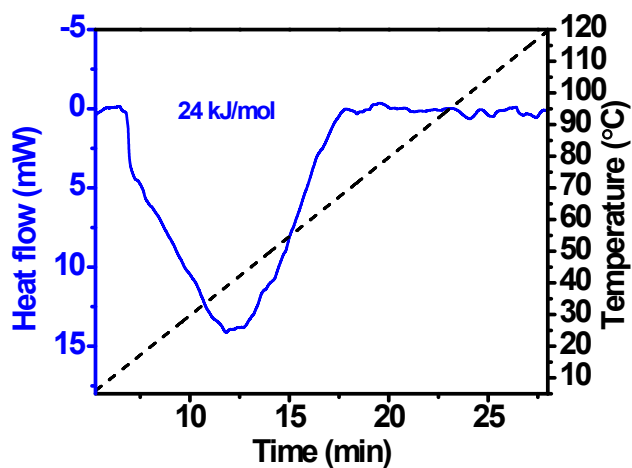

**Figure S11.** DSC profiles corresponding to desorption of CO<sub>2</sub> from RHA-MIL-101(Cr)-IV.

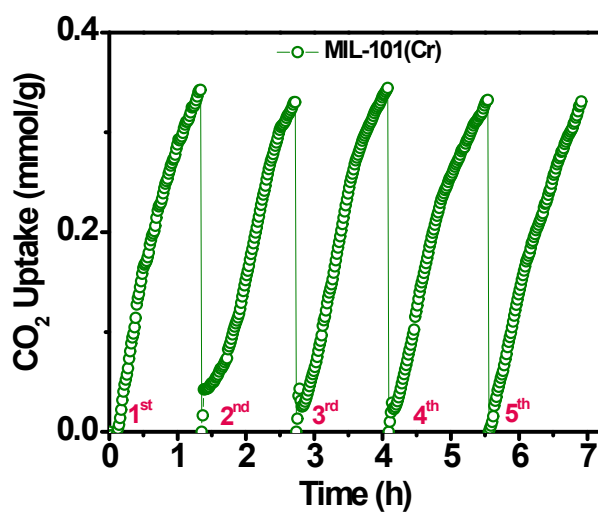

**Figure S12.** Temperature-swing adsorption (TSA) cycles of MIL-101(Cr) (Adsorption condition: 30 °C for 80 min. Desorption condition: 110 °C for 30 min).

**Table S1.** Si:Cr ratio obtained from ICP-AES analysis for RHA-MIL-101(Cr).

| Element ratio | RHA-MIL-101(Cr)-I | RHA-MIL-101(Cr)-II | RHA-MIL-101(Cr)-III | RHA-MIL-101(Cr)-IV | RHA-MIL-101(Cr)-V |
|---------------|-------------------|--------------------|---------------------|--------------------|-------------------|
| Si:Cr         | 0.001             | 0.004              | 0.008               | 0.012              | 0.014             |

**Table S2.** Comparative chart of CO<sub>2</sub> adsorption performance of adsorbents under DAC condition.

| Material                  | Temp. (°C) | CO <sub>2</sub> concentration (ppm) | CO <sub>2</sub> adsorption capacity (mmol/g)   | Method       | Ref.             |
|---------------------------|------------|-------------------------------------|------------------------------------------------|--------------|------------------|
| <b>Physisorbents</b>      |            |                                     |                                                |              |                  |
| <b>RHA-MIL-101(Cr)-IV</b> | <b>30</b>  | <b>400</b>                          | <b>1.06 (dry)<br/>0.82 (humid)<sup>1</sup></b> | <b>TGA</b>   | <b>This work</b> |
| SIFSIX-2-Cu-i             | 25         | 400                                 | 0.07                                           | vol.         | 2                |
| SIFSIX-3-Zn               | 25         | 400                                 | 0.13                                           | vol.         | 2                |
| SIFSIX-3-Cu               | 25         | 400                                 | 1.24                                           | vol.         | 2                |
| Mg-MOF-74                 | 25         | 400                                 | 0.08                                           | vol.         | 2                |
| SIFSIX-3-Ni               | 23         | 400                                 | 0.18                                           | TPD          | 3                |
| HKUST-1                   | 23         | 400                                 | 0.05                                           | TPD          | 3                |
| Mg-MOF-74                 | 23         | 400                                 | 0.14                                           | TPD          | 3                |
| Zeolite-13X               | 23         | 400                                 | 0.03                                           | TPD          | 3                |
| SIFSIX-3-Cu               | 23         | 400                                 | 0.32                                           | TPD          | 4                |
| DICRO-3-Ni-i              | 23         | 400                                 | 0.04                                           | TPD          | 4                |
| SIFSIX-2-Cu-i             | 23         | 400                                 | 0.04                                           | TPD          | 4                |
| MOOFOUR-1-Ni              | 23         | 400                                 | 0.06                                           | TPD          | 4                |
| Ni-4-PyC                  | 23         | 400                                 | 0.74                                           | TPD          | 4                |
| DMOF-1                    | 23         | 400                                 | 0.03                                           | TPD          | 4                |
| ZIF-8                     | 23         | 400                                 | 0.05                                           | TPD          | 4                |
| MIL-101                   | 23         | 400                                 | 0.02                                           | TPD          | 4                |
| UiO-66                    | 23         | 400                                 | 0.02                                           | TPD          | 4                |
| NbOFFIVE-1-Ni             | 25         | 400                                 | 1.30                                           | vol. and TGA | 5                |
| Zeolite-13X (APG-III)     | 22         | 400                                 | 0.48-0.51                                      | vol. and GC  | 6                |
| Zeolite NaX               | 25         | 395                                 | 0.41                                           | vol. and TGA | 7                |
| Zeolite Li-LSX            | 25         | 395                                 | 1.34                                           | vol. and TGA | 7                |
| Zeolite Na-LSX            | 25         | 395                                 | 0.87                                           | vol. and TGA | 7                |
| Zeolite Ca-LSX            | 25         | 395                                 | 0.76                                           | vol. and TGA | 7                |
| NaY                       | 25         | 395                                 | 0.08                                           | vol. and TGA | 7                |
| CaY                       | 25         | 395                                 | 0.14                                           | vol. and TGA | 7                |
| <b>Chemisorbents</b>      |            |                                     |                                                |              |                  |
| PEI-MIL-101(Cr)           | 25         | 400                                 | 1.25 (dry)<br>1.26 (humid) <sup>2</sup>        | TGA          | 8                |
| PEI-MIL-101(Cr)           | 25         | 400                                 | 1.81                                           | vol.         | 9                |

|                                   |    |     |      |      |    |
|-----------------------------------|----|-----|------|------|----|
| TEPA-MIL-101(Cr)                  | 25 | 400 | 2.14 | vol. | 9  |
| ED-Mg <sub>2</sub> (dobpdc)       | 25 | 390 | 2.83 | vol. | 10 |
| Hydrazine-Mg <sub>2</sub> (dobdc) | 25 | 400 | 3.89 | TGA  | 11 |
| ED-Mg-MOF-74                      | 25 | 400 | 1.51 | TGA  | 12 |
| mmen-Mg <sub>2</sub> (dobpdc)     | 25 | 390 | 2.0  | vol. | 13 |
| TAEA-Cr-MIL-101-SO <sub>3</sub> H | 20 | 400 | 1.12 | TGA  | 14 |

<sup>1</sup>50±3% relative humidity. <sup>2</sup>32% relative humidity (TEPA = tetraethylenepentamine), (PEI = polyethyleneimine), (ED = Ethylenediamine), (TAEA = tris(2-aminoethyl)amine), (mmen = N,N'-dimethylethylenediamine).  
vol., volumetric; TGA, thermogravimetric analysis; TPD, temperature programmed desorption

**Table S3.** Comparative chart of cyclic CO<sub>2</sub> adsorption-desorption stability of various adsorbents for DAC application.

| Support                  | Amine type | Sorbent regeneration condition                                                                   | Stability performance                                                                                                                     | Ref.             |
|--------------------------|------------|--------------------------------------------------------------------------------------------------|-------------------------------------------------------------------------------------------------------------------------------------------|------------------|
| <b>RHA-MIL-101(Cr)</b>   | -          | <b>110 °C for 0.5 h under N<sub>2</sub> flow at 20 mL min<sup>-1</sup></b>                       | <b>Stable over short multicycle operations (5 cycles)</b>                                                                                 | <b>This work</b> |
| Silica                   | PEI        | 110 °C for 3 h under Ar flow at 100 mL min <sup>-1</sup>                                         | 30.1% capacity loss in 4 cyclic runs                                                                                                      | 15               |
| Silica                   | A-PEI      | 110 °C for 3 h under Ar flow at 100 mL min <sup>-1</sup>                                         | 9.3% capacity loss in 4 cyclic runs                                                                                                       | 15               |
| Silica                   | T-PEI      | 110 °C for 3 h under Ar flow at 100 mL min <sup>-1</sup>                                         | 1.36% capacity loss in 4 cyclic runs                                                                                                      | 15               |
| Fumed Silica             | PEI        | 85 °C for 3 h under vacuum                                                                       | 3.5% capacity loss in 4 cyclic runs                                                                                                       | 16               |
| Hierarchical Silica      | PEI        | 110 °C for 6 h under He flow at 100 mL min <sup>-1</sup>                                         | 16% capacity loss in 5 cyclic runs humid condition, whereas no appreciable change in CO <sub>2</sub> adsorption capacity in dry condition | 17               |
| SBA-15                   | PEI        | 110 °C for 9 h under Ar flow at 100 mL min <sup>-1</sup>                                         | Stable over short multicycle operations (3 cyclic runs)                                                                                   | 18               |
| CA-SiO <sub>2</sub>      | PEI        | 110 °C for 2 h under He flow                                                                     | 9.6% pseudo-equilibrium capacity and 16% breakthrough capacity loss in 20 cyclic runs                                                     | 19               |
| Mg <sub>2</sub> (dobpdc) | en         | 150 °C for 2 h under simulated air (0.39 mbar CO <sub>2</sub> ) purge at 60 mL min <sup>-1</sup> | 6% capacity loss in 5 cyclic runs                                                                                                         | 10               |
| MIL-101-Cr               | PEI        | 110 °C for 3 h under He flow at 90 mL min <sup>-1</sup>                                          | CO <sub>2</sub> uptake dropped 2.7 % and 1.9% after the first and second cycles, respectively (total 3 cyclic runs)                       | 8                |
| Pore-expanded MCM-41     | TRI        | 100 °C for 3 h by synthetic air at 10 mL min <sup>-1</sup>                                       | ~24% capacity loss in 4 cyclic runs <sup>1</sup>                                                                                          | 20               |



<sup>1</sup>Data retrieved from Data from graph software (Version 1.0) (TEPA = tetraethylenepentamine), (PEI = polyethyleneimine), (A-PEI = 3-aminopropyl)triethoxysilane-PEI), (T-PEI = Tetrapropyl orthotitanate-PEI), (en = ethylenediamine)

## References

- (1) Klinthong, W.; Huang, C. H.; Tan, C. S. Polyallylamine and NaOH as a Novel Binder to Pelletize Amine-Functionalized Mesoporous Silicas for CO<sub>2</sub> Capture. *Microporous Mesoporous Mater.* **2014**, *197*, 278–287.
- (2) Shekhah, O.; Belmabkhout, Y.; Chen, Z.; Guillerm, V.; Cairns, A.; Adil, K.; Eddaoudi, M. Made-to-Order Metal-Organic Frameworks for Trace Carbon Dioxide Removal and Air Capture. *Nat. Commun.* **2014**, *5* (1), 1–7.
- (3) Kumar, A.; Madden, D. G.; Lusi, M.; Chen, K. J.; Daniels, E. A.; Curtin, T.; Perry, J. J.; Zaworotko, M. J. Direct Air Capture of CO<sub>2</sub> by Physisorbent Materials. *Angew. Chem. Int. Ed.* **2015**, *54* (48), 14372–14377.
- (4) Madden, D. G.; Scott, H. S.; Kumar, A.; Chen, K. J.; Sani, R.; Bajpai, A.; Lusi, M.; Curtin, T.; Perry, J. J.; Zaworotko, M. J. Flue-Gas and Direct-Air Capture of CO<sub>2</sub> by Porous Metal-Organic Materials. *Philos. Trans. R. Soc., A* **2017**, *375*, 20160025
- (5) Bhatt, P. M.; Belmabkhout, Y.; Cadiau, A.; Adil, K.; Shekhah, O.; Shkurenko, A.; Barbour, L. J.; Eddaoudi, M. A Fine-Tuned Fluorinated MOF Addresses the Needs for Trace CO<sub>2</sub> Removal and Air Capture Using Physisorption. *J. Am. Chem. Soc.* **2016**, *138* (29), 9301–9307.
- (6) Wilson, S. M. W.; Tezel, F. H. Direct Dry Air Capture of CO<sub>2</sub> Using VTSA with Faujasite Zeolites. *Ind. Eng. Chem. Res.* **2020**, *59* (18), 8783–8794.
- (7) Stuckert, N. R.; Yang, R. T. CO<sub>2</sub> Capture from the Atmosphere and Simultaneous Concentration Using Zeolites and Amine-Grafted SBA-15. *Environ. Sci. Technol.* **2011**, *45* (23), 10257–10264.
- (8) Darunte, L. A.; Oetomo, A. D.; Walton, K. S.; Sholl, D. S.; Jones, C. W. Direct Air Capture of CO<sub>2</sub> Using Amine Functionalized MIL-101(Cr). *ACS Sustain. Chem. Eng.* **2016**, *4* (10), 5761–5768.
- (9) Rim, G.; Kong, F.; Song, M.; Rosu, C.; Priyadarshini, P.; Lively, R. P.; Jones, C. W. Sub-Ambient Temperature Direct Air Capture of CO<sub>2</sub> Using Amine-Impregnated MIL-

- 101(Cr) Enables Ambient Temperature CO<sub>2</sub> Recovery. *JACS Au* **2022**, 2 (2), 380–393.
- (10) Lee, W. R.; Hwang, S. Y.; Ryu, D. W.; Lim, K. S.; Han, S. S.; Moon, D.; Choi, J.; Hong, C. S. Diamine-Functionalized Metal-Organic Framework: Exceptionally High CO<sub>2</sub> Capacities from Ambient Air and Flue Gas, Ultrafast CO<sub>2</sub> Uptake Rate, and Adsorption Mechanism. *Energy Environ. Sci.* **2014**, 7 (2), 744–751.
- (11) Liao, P. Q.; Chen, X. W.; Liu, S. Y.; Li, X. Y.; Xu, Y. T.; Tang, M.; Rui, Z.; Ji, H.; Zhang, J. P.; Chen, X. M. Putting an Ultrahigh Concentration of Amine Groups into a Metal-Organic Framework for CO<sub>2</sub> Capture at Low Pressures. *Chem. Sci.* **2016**, 7 (10), 6528–6533.
- (12) Choi, S.; Watanabe, T.; Bae, T. H.; Sholl, D. S.; Jones, C. W. Modification of the Mg/DOBDC MOF with Amines to Enhance CO<sub>2</sub> Adsorption from Ultradilute Gases. *J. Phys. Chem. Lett.* **2012**, 3 (9), 1136–1141.
- (13) McDonald, T. M.; Lee, W. R.; Mason, J. A.; Wiers, B. M.; Hong, C. S.; Long, J. R. Capture of Carbon Dioxide from Air and Flue Gas in the Alkylamine-Appended Metal-Organic Framework Mmen-Mg<sub>2</sub>(Dobpdc). *J. Am. Chem. Soc.* **2012**, 134 (16), 7056–7065.
- (14) Li, H.; Wang, K.; Feng, D.; Chen, Y. P.; Verdegaal, W.; Zhou, H. C. Incorporation of Alkylamine into Metal–Organic Frameworks through a Brønsted Acid–Base Reaction for CO<sub>2</sub> Capture. *ChemSusChem* **2016**, 9 (19), 2832–2840.
- (15) Choi, S.; Gray, M. L.; Jones, C. W. Amine-Tethered Solid Adsorbents Coupling High Adsorption Capacity and Regenerability for CO<sub>2</sub> Capture From Ambient Air. *ChemSusChem* **2011**, 4 (5), 628–635.
- (16) Goeppert, A.; Czaun, M.; May, R. B.; Prakash, G. K. S.; Olah, G. A.; Narayanan, S. R. Carbon Dioxide Capture from the Air Using a Polyamine Based Regenerable Solid Adsorbent. *J. Am. Chem. Soc.* **2011**, 133 (50), 20164–20167.
- (17) Kwon, H. T.; Sakwa-Novak, M. A.; Pang, S. H.; Sujan, A. R.; Ping, E. W.; Jones, C. W. Aminopolymer-Impregnated Hierarchical Silica Structures: Unexpected Equivalent CO<sub>2</sub> Uptake under Simulated Air Capture and Flue Gas Capture Conditions. *Chem. Mater.* **2019**, 31 (14), 5229–5237.
- (18) Chaikittisilp, W.; Kim, H. J.; Jones, C. W. Mesoporous Alumina-Supported Amines as

- Potential Steam-Stable Adsorbents for Capturing CO<sub>2</sub> from Simulated Flue Gas and Ambient Air. *Energy and Fuels* **2011**, 25 (11), 5528–5537.
- (19) Sujan, A. R.; Pang, S. H.; Zhu, G.; Jones, C. W.; Lively, R. P. Direct CO<sub>2</sub> Capture from Air Using Poly(Ethylenimine)-Loaded Polymer/Silica Fiber Sorbents. *ACS Sustain. Chem. Eng.* **2019**, 7 (5), 5264–5273.
- (20) Wagner, A.; Steen, B.; Johansson, G.; Zanghellini, E.; Jacobsson, P.; Johansson, P. Carbon Dioxide Capture from Ambient Air Using Amine-Grafted Mesoporous Adsorbents. *Int. J. Spectrosc.* **2013**, 2013, 1–8.
